# Supplementary material
Source: PubMed Central journal article supplement (PMC4528955)
Supplement: supp_kwv057_kwv057supp.pdf [file supp_kwv057_kwv057supp.pdf]

Web Table 1. Descriptions of BIV Identification Methods

| Method          | Weight                                                                                                                                                        | Height                                                                                                             | BMI                                                                                           | Change <sup>a</sup>                                         | Reference                                 |
|-----------------|---------------------------------------------------------------------------------------------------------------------------------------------------------------|--------------------------------------------------------------------------------------------------------------------|-----------------------------------------------------------------------------------------------|-------------------------------------------------------------|-------------------------------------------|
| <b>External</b> |                                                                                                                                                               |                                                                                                                    |                                                                                               |                                                             |                                           |
| A               | -5.0 ≤ Weight for age z-score ≥ 5.0                                                                                                                           | -5.0 ≤ Height for age z-score ≥ 3.0                                                                                | -4.0 ≤ Weight for height or BMI z-score ≥ 5.0                                                 | Not applicable                                              | CDC growth charts/WHO (8, 9)<br>YRBS (10) |
| B               | Male: 13.62-90.72kg<br>Female: 13.62-90.72kg                                                                                                                  | Male: 0.94-1.68m<br>Female: 0.94-1.73m<br>11-12 yrs: 1.02-1.83m<br>13-14 yrs: 1.27-1.98m<br>≥ 15 years: 1.27-2.11m | Male: 11.5-41<br>Female: 11-40<br>11-12 yrs: 11.5-41<br>13-14 yrs: 13-55<br>≥ 15 years: 13-55 | Not applicable                                              |                                           |
| C               |                                                                                                                                                               |                                                                                                                    | 8 > BMI value > 40                                                                            | Not applicable                                              | Lobstein et al (37)                       |
| <b>Internal</b> |                                                                                                                                                               |                                                                                                                    |                                                                                               |                                                             |                                           |
| D               |                                                                                                                                                               |                                                                                                                    |                                                                                               | Omitted the largest and smallest changes (1%) in BMI values | Sturm et al (34)                          |
| E               |                                                                                                                                                               |                                                                                                                    | BMI values > 4 standard deviations above/below the mean for sex and age                       | Not applicable                                              | Conde et al (16)                          |
| F               | Flagged values > 99 <sup>th</sup> percentile or < 1 <sup>st</sup> percentile of NHANES III for review; BIV determination made by comparing to other available |                                                                                                                    |                                                                                               | Not applicable                                              | NHANES (18)                               |

anthropometric values (e.g., waist circumference, DEXA)

| Mixed <sup>b</sup> |                                                                                                                                    |                                                                                                                                                         |                                                                                                                                                                                                                                                                                                                                                                                                                                                        |                                                                                                                          |                  |
|--------------------|------------------------------------------------------------------------------------------------------------------------------------|---------------------------------------------------------------------------------------------------------------------------------------------------------|--------------------------------------------------------------------------------------------------------------------------------------------------------------------------------------------------------------------------------------------------------------------------------------------------------------------------------------------------------------------------------------------------------------------------------------------------------|--------------------------------------------------------------------------------------------------------------------------|------------------|
| G                  | -6.0 ≤ Weight for age z-score ≥ 6.0                                                                                                | -6.0 ≤ Height for age z-score ≥ 6.0                                                                                                                     | -4.0 ≤ Weight for height/BMI z-score ≥ 5.0                                                                                                                                                                                                                                                                                                                                                                                                             | Annual age and sex specific mean changes of ±3 SD in BMI<br>Height decrements >1 inch<br>Mean increases in height > 3 SD | Kim et al (3)    |
| H                  | a) < 1 <sup>st</sup> percentile minus 30% of median body weight<br>b) >99 <sup>th</sup> percentile plus 200% of median body weight | a) height < 30.5 cm<br>b) height < 1 <sup>st</sup> percentile minus 30.5 cm<br>c) height > 221 cm<br>d) height > 99 <sup>th</sup> percentile plus 61 cm |                                                                                                                                                                                                                                                                                                                                                                                                                                                        | Not assessed                                                                                                             | Smith et al (31) |
| I                  | weight < 4.5kg (excluded without review)                                                                                           | a) -5.0 ≤ Height for age z-score ≥ 3.0 (excluded without review)<br>b) height < 61cm (excluded without review)                                          | a) BMI < 10 (excluded without review)<br>b) Flagged: obese children with BMI or height differing by more than 15% or weight by more than 20% per year at a prior or subsequent visit within 2 years who also had any of:<br>(1) BMI percentile > 99 <sup>th</sup><br>(2) BMI > 120% of 95 <sup>th</sup> percentile,<br>(3) BMI Z-score ≥ 2.5<br>(4) BMI percentile = 95 <sup>th</sup> -98 <sup>th</sup> plus another BMI ≥ 95 <sup>th</sup> percentile | Not assessed                                                                                                             | Lo et al (17)    |

Excluded: after review  
from expert pediatric  
endocrinologist <sup>c</sup>

|   |                                                                                                                                        |                                                                                                                                                                                                                                                                                                                                                                                                                                                                                                                                                                                                                                                            |                      |
|---|----------------------------------------------------------------------------------------------------------------------------------------|------------------------------------------------------------------------------------------------------------------------------------------------------------------------------------------------------------------------------------------------------------------------------------------------------------------------------------------------------------------------------------------------------------------------------------------------------------------------------------------------------------------------------------------------------------------------------------------------------------------------------------------------------------|----------------------|
| J |                                                                                                                                        | 1) Flagged if either:<br>a) increase or decrease of 50<br>or more BMI percentile<br>points<br>b) a change of 50% or more<br>of their body weight<br>Deleted if:<br>a) flagged value exceeded<br>value for age- and sex-<br>exhibited in 2 most recent<br>national surveillance data<br>sets (i.e., NHANES III)<br>b) flagged values showed<br>weight change of greater<br>than 50 lb per year or 60 lbs<br>per year for youth who were<br>obese at baseline as per<br>individual review by expert<br>pediatric endocrinologist<br>c) a height change greater<br>than 2 standard deviations<br>above their normative height<br>velocity change <sup>d</sup> | Lawman et al<br>(29) |
| K | a) BMI values < 12 for<br>pre-adolescents or<br>12.5 for adolescents<br>b) BMI values > 3 SD<br>above the mean<br>excluded as outliers | Not assessed                                                                                                                                                                                                                                                                                                                                                                                                                                                                                                                                                                                                                                               | Field et al<br>(15)  |

---

Notes: Abbreviations: BIV=biologically implausible values; CDC=Centers for Disease Control and Prevention; NHANES=National Health and Nutrition Examination Survey; SD=standard deviation; WHO=World Health Organization; YRBS=Youth Risk Behavior Surveillance Survey. <sup>a</sup> Not applicable was noted for cross-sectional data, Not assessed was noted where longitudinal data were obtained but implausible change over time was not assessed. <sup>b</sup> Percentiles and z-scores refer to national reference data. <sup>c</sup> This criteria utilized longitudinal data in the determination of assessment for individual implausible values but did not assess criteria for implausible change over time. <sup>d</sup> According to Tanner J, Davies P. Clinical longitudinal standards for height and height velocity for North American children. *The Journal of Pediatrics*. 1985;107(3):317-29.

METHODS TO IDENTIFY BIOLOGICALLY IMPLAUSIBLE VALUES 5

Web Table 2. Large-scale epidemiological studies and treatment of BIV identification.

|    | Reference                                                        | BIV Identification       | Notes                                                                                                                                                                                                                                                                                                                                                                                                            |
|----|------------------------------------------------------------------|--------------------------|------------------------------------------------------------------------------------------------------------------------------------------------------------------------------------------------------------------------------------------------------------------------------------------------------------------------------------------------------------------------------------------------------------------|
| 1  | Avon Longitudinal Study of Parents and Children(1)               | Not mentioned            |                                                                                                                                                                                                                                                                                                                                                                                                                  |
| 2  | National Longitudinal Study of Adolescent Health(2)              | Not mentioned            |                                                                                                                                                                                                                                                                                                                                                                                                                  |
| 3  | Padez et al. (3)                                                 | Not mentioned            |                                                                                                                                                                                                                                                                                                                                                                                                                  |
| 4  | Sardinha et al (4)                                               | Not mentioned            |                                                                                                                                                                                                                                                                                                                                                                                                                  |
| 5  | Rolland-Cachera et al (5)                                        | Not mentioned            |                                                                                                                                                                                                                                                                                                                                                                                                                  |
| 6  | Savva et al (6)                                                  | Not mentioned            |                                                                                                                                                                                                                                                                                                                                                                                                                  |
| 7  | Pediatric Rosetta Body Composition Project (7)                   | Not mentioned            |                                                                                                                                                                                                                                                                                                                                                                                                                  |
| 8  | Kleiser et al (8)                                                | Not mentioned            |                                                                                                                                                                                                                                                                                                                                                                                                                  |
| 9  | Kobzová et al (9)                                                | Not mentioned            |                                                                                                                                                                                                                                                                                                                                                                                                                  |
| 10 | Health Behaviour in School-Aged Children Study (10)              | Not mentioned            | “out of range values were coded as missing”                                                                                                                                                                                                                                                                                                                                                                      |
| 11 | Bogalusa Heart Study                                             | Not Mentioned            |                                                                                                                                                                                                                                                                                                                                                                                                                  |
| 12 | HEALTHY Study (11)                                               | Not mentioned            |                                                                                                                                                                                                                                                                                                                                                                                                                  |
| 13 | SNIPPY Study (12)                                                | Not mentioned            |                                                                                                                                                                                                                                                                                                                                                                                                                  |
| 14 | Savva et al (13)                                                 | Not mentioned            |                                                                                                                                                                                                                                                                                                                                                                                                                  |
| 15 | Moreno et al (14)                                                | Not mentioned            |                                                                                                                                                                                                                                                                                                                                                                                                                  |
| 16 | Canadian National Longitudinal Survey of Children and Youth (15) | Not mentioned            |                                                                                                                                                                                                                                                                                                                                                                                                                  |
| 17 | Health Survey for England (16)                                   | Not mentioned            |                                                                                                                                                                                                                                                                                                                                                                                                                  |
| 18 | Growing Up Today Study (17)                                      | Insufficient information | See Table 1 in main document for criteria. No prevalence reported                                                                                                                                                                                                                                                                                                                                                |
| 19 | Growing Up Today Study (18)                                      | Insufficient information | BIV criteria: age-specific weight and height z-score below -6 or above 6 and BMI z-score below -4 or above 5 to identify BIV. No prevalence reported                                                                                                                                                                                                                                                             |
| 20 | Dennison et al (19)                                              | Insufficient information | Visually examined individual plots of anthropometric data point (height, weight, BMI) by age and by identifying BIV for weight-for-height or BMI-for-age using WHO recommendations ( $z$ score $< -4$ or $> +5$ ). This examination revealed many cases in which the child's growth (height, weight, and BMI) was tracking linearly at high values that would be considered biologically implausible if only the |

METHODS TO IDENTIFY BIOLOGICALLY IMPLAUSIBLE VALUES 6

|    |                                                                                         |                          |                                                                                                                                                                                                                                                                                                                                                                                                                                                                                     |
|----|-----------------------------------------------------------------------------------------|--------------------------|-------------------------------------------------------------------------------------------------------------------------------------------------------------------------------------------------------------------------------------------------------------------------------------------------------------------------------------------------------------------------------------------------------------------------------------------------------------------------------------|
|    |                                                                                         |                          | individual measures were assessed. Children with consistently high measures ( $N = 25$ ), although identified as biologically implausible, were retained for analysis                                                                                                                                                                                                                                                                                                               |
| 21 | National Survey of Children’s Health (20)                                               | Insufficient information | “extreme height and weight values were recoded to reasonable height and low values to protect confidentiality and were flagged to indicate data were reported or assigned”                                                                                                                                                                                                                                                                                                          |
| 22 | Youth Risk Behavior Surveillance (21)                                                   | Insufficient information | See Table 1 in main document for criteria. No prevalence reported                                                                                                                                                                                                                                                                                                                                                                                                                   |
| 23 | National Longitudinal Survey of Youth–Child Cohort (22)                                 | Insufficient information | Data documentation reported flags for heights and weights outside of “what is considered normal for a child this age.” The documentation reports if flags were verified by the interviewer and the number of flags.                                                                                                                                                                                                                                                                 |
| 24 | National Health and Nutrition Examination Survey (23)                                   | Insufficient information | “The data were edited for values that exceeded the capacity of the measuring equipment. Biologically implausible values were identified by examining age and sex-specific measurements that exceeded the 1st and 99th percentile values of the NHANES III distributions for each measure. A small number of observations that were implausible were set to missing.” No prevalence reported.                                                                                        |
| 25 | Ohio Special Supplemental Nutrition Program for Women, Infants, and Children (WIC) (24) | Insufficient information | The weight-for-height $z$ score (WHZ) was calculated for all available paired height and weight measurements. Because biologically implausible norms are available for WHZ, but not for BMI $z$ scores, data cleaning was performed for the WHZ. Paired measurements were excluded if the height was outside the range used to calculate WHZ in the growth reference (77 to 121.5 cm) or if the WHZ was biologically implausible ( $WHZ \leq -4$ or $>5$ ). No prevalence provided. |
| 26 | Gleason et al (25)                                                                      | Insufficient information | Study team members measured and weighed sample members in their schools, and 2,228 sample members (96% of the main SNDA-III analysis sample) had valid height and weight data. Those without valid data included a small number of                                                                                                                                                                                                                                                  |

METHODS TO IDENTIFY BIOLOGICALLY IMPLAUSIBLE VALUES 7

|    |                                                                                         |                          |                                                                                                                                                                                                                                                               |
|----|-----------------------------------------------------------------------------------------|--------------------------|---------------------------------------------------------------------------------------------------------------------------------------------------------------------------------------------------------------------------------------------------------------|
|    |                                                                                         |                          | children for whom height and weight measurements were never completed and a few others that were excluded because they had biologically implausible values. We used standards for biologically implausible values as defined by the World Health Organization |
| 27 | Lobstein et al (26)                                                                     | Insufficient information | See Table 1 for criteria. No prevalence provided.                                                                                                                                                                                                             |
| 28 | Ohio school surveillance data (27)                                                      | Insufficient information | No prevalence provided.                                                                                                                                                                                                                                       |
| 29 | Early Childhood Longitudinal Study (28)                                                 | Complete                 |                                                                                                                                                                                                                                                               |
| 30 | Get Healthy Philly (29)                                                                 | Complete                 |                                                                                                                                                                                                                                                               |
| 31 | Boston school surveillance data (30)                                                    | Complete                 |                                                                                                                                                                                                                                                               |
| 32 | Lo et al (31)                                                                           | Complete                 |                                                                                                                                                                                                                                                               |
| 33 | Smith et al (32)                                                                        | Complete                 |                                                                                                                                                                                                                                                               |
| 34 | Child Health and Human Development Study of Early Child Care and Youth Development (33) | Complete                 |                                                                                                                                                                                                                                                               |
| 35 | Weedn et al (34)                                                                        | Complete                 |                                                                                                                                                                                                                                                               |
| 36 | Pediatric Nutrition Surveillance System (35)                                            | Complete                 |                                                                                                                                                                                                                                                               |
| 37 | The Three City Study (36)                                                               | Complete                 |                                                                                                                                                                                                                                                               |
| 38 | Sekhobo et al (37)                                                                      | Complete                 |                                                                                                                                                                                                                                                               |
| 39 | Novotny et al (38)                                                                      | Complete                 |                                                                                                                                                                                                                                                               |
| 40 | California school surveillance data (39)                                                | Complete                 |                                                                                                                                                                                                                                                               |
| 41 | Conde et al (40)                                                                        | Complete                 |                                                                                                                                                                                                                                                               |
| 42 | New York school surveillance data (41)                                                  | Complete                 |                                                                                                                                                                                                                                                               |

METHODS TO IDENTIFY BIOLOGICALLY IMPLAUSIBLE VALUES 8

Web Table 3. Descriptions of BIV method development samples.

| Method          | Origin of Study or Data                                                            | Sample Size              | Age                        | Characteristics                                           | BIV related Psychometrics                                                               | Data Collection Year & Ref |
|-----------------|------------------------------------------------------------------------------------|--------------------------|----------------------------|-----------------------------------------------------------|-----------------------------------------------------------------------------------------|----------------------------|
| <b>External</b> |                                                                                    |                          |                            |                                                           |                                                                                         |                            |
| A               | WHO recommendations using 1977 National Center for Health Statistics growth charts | 22,917                   | birth-18 years             | FELS infant data and nationally representative youth data | None                                                                                    | 1977 (42, 43)              |
| B               | Youth Risk Behavior Surveillance                                                   | 9,079                    | 9-12 graders               | nationally representative youth                           | None                                                                                    | 2007 (21)                  |
| C               | Health Survey for England                                                          | 2,882                    | 5-18 years                 | England nationally representative youth                   | None                                                                                    | 1998 (26)                  |
| <b>Internal</b> |                                                                                    |                          |                            |                                                           |                                                                                         |                            |
| D               | Early Childhood Longitudinal Study                                                 | 6,918                    | K -3 <sup>rd</sup> graders | nationally representative youth                           | None                                                                                    | 1998-2002 (28)             |
| E               | Brazilian National Nutrition and Health Survey                                     | 26,102                   | 2-19 years                 | Brazilian nationally representative youth                 | None                                                                                    | 1989 (40)                  |
| F               | National Health and Nutrition Examination Survey III (2000 growth charts)          | ~10,000 per 2-year cycle | Birth-80+ years            | nationally representative youth and adults                | None                                                                                    | 1999-2012 (23)             |
| <b>Mixed</b>    |                                                                                    |                          |                            |                                                           |                                                                                         |                            |
| G               | Boston school surveillance data                                                    | 8,643                    | 5-14 years                 | 41% White<br>34% Black<br>14% Hispanic<br>11% Asian       | None                                                                                    | 1999-2003 (30)             |
|                 | Longitudinal sample                                                                | 5,301                    |                            |                                                           |                                                                                         |                            |
| H               | Kaiser Permanente Southern California medical records                              | 710,949                  | 2-19 years                 | Not provided                                              | Proportion of false positives (valid data marked implausible) <5% for each selected BIV | 2006-2008 (32)             |



METHODS TO IDENTIFY BIOLOGICALLY IMPLAUSIBLE VALUES 9

|   |                                                             |        |                                             |                                                    | rule, except<br>upper weight<br>limit (8%) |                       |
|---|-------------------------------------------------------------|--------|---------------------------------------------|----------------------------------------------------|--------------------------------------------|-----------------------|
| I | Kaiser Permanente<br>Northern California<br>medical records | 42,559 | 3-5<br>years                                | 26% White<br>24% Hispanic<br>22% Asian<br>6% Black | None                                       | 2007-<br>2010<br>(31) |
| J | Get Healthy Philly<br>longitudinal sample                   | 13,662 | 1 <sup>st</sup> -7 <sup>th</sup><br>graders | 64% Black<br>18% Hispanic<br>8% Asian<br>7% White  | None                                       | 2011-<br>2012<br>(29) |
| K | Growing Up Today<br>Study                                   | 14,972 | 9-14<br>years                               | >90% White                                         | None                                       | 1996-<br>1999<br>(17) |

---

Web Table 4. BIV prevalence rates in peer-reviewed publications across BIV identification methods.

| Method          | BIV prevalence in cross-sectional studies                                                                                         | BIV prevalence in longitudinal studies |
|-----------------|-----------------------------------------------------------------------------------------------------------------------------------|----------------------------------------|
| <b>External</b> |                                                                                                                                   |                                        |
| A               | 0.03% (36)<br>0.08% (33)<br>0.5% (44)<br>0.7% (34)<br>0.8% (41)<br>1.1% (38)<br>1.1% (39)<br>1.5% (37)<br>1.6% (45)<br>2%-3% (46) |                                        |
| B               | Unknown (47)                                                                                                                      |                                        |
| C               | Unknown (26)                                                                                                                      |                                        |
| <b>Internal</b> |                                                                                                                                   |                                        |
| D               | 1% (28)                                                                                                                           | 1% (28)                                |
| E               | 1% (40) <sup>a</sup>                                                                                                              |                                        |
| F               | Unknown                                                                                                                           |                                        |
| <b>Mixed</b>    |                                                                                                                                   |                                        |
| G               | 0.2% - 0.3% (30, 48)                                                                                                              | 4.1% – 4.5% (30, 48)                   |
| H               | 0.6% (49)<br>2.0% (32)                                                                                                            |                                        |
| I               | 0.06% (31)                                                                                                                        |                                        |
| J               |                                                                                                                                   | 0.3% (29)                              |
| K               | Unknown (17)                                                                                                                      |                                        |

Notes: <sup>a</sup> Included prevalence of missing data and BIV combined

## Web Material References

1. Northstone K, Carmichael A, Sadler S, Golding J. Avon Longitudinal Study of Parents and Children: Children in Focus built files data documentation 2010 [cited V7a Oct 20, 2014]. Available from: <http://www.bristol.ac.uk/alspac/researchers/data-access/data-dictionary/>
2. Entzel P, Whitsel E, Richardson A, Tabor J, Hallquist S, Hussey J, et al. Add Health Wave IV Documentation: Cardiovascular and anthropometric measures 2009 [Oct 20, 2014]. Available from: <http://www.cpc.unc.edu/projects/addhealth/data/guides/Wave%20IV%20cardiovascular%20and%20anthropometric%20documentation%20110209.pdf>
3. Padez C, Fernandes T, Mourao P, Rosado V. Prevalence of overweight and obesity in 7-9 year old Portuguese children: Trends in body mass index from 1970-2002. *American Journal of Human Biology*. 2004;16:670-678.
4. Sardinha LB, Santos R, Vale S, Silva A, Ferreira J, Moreira H, et al. Prevalence of overweight and obesity among Portuguese youth: A study in a representative sample of 10–18-year-old children and adolescents. *Int J Pediatr Obes*. 2011;6(2 Part 2):e124-e128.
5. Rolland-Cachera M, Castetbon K, Arnault N, Bellisle F, Romano M, Lehingue Y, et al. Body mass index in 7-9-y-old French children: frequency of obesity, overweight and thinness. *Int J Obes*. 2002;26(12):1610-1616.
6. Savva S, Kourides Y, Tornaritis M, Epiphaniou-Savva M, Chadjigeorgious C, Kafatos A. Obesity in children and adolescents in Cyprus. . *Int J Obes*. 2002;26(8):1036-1045.
7. Freedman D, Wang J, Maynard L, Thornton J, Mei Z, Pierson Jr R, et al. Relation of BMI to fat and fat-free mass among children and adolescents. *Int J Obes*. 2005;29:1-8.
8. Kleiser C, Rosario A, Mensink G, Prinz-Langenohl R, Jurth B. Potential determinants of obesity among children and adolescents in Germany: results from the cross-sectional KiGGS study. *BMC Public Health*. 2009;9(46):1-14.
9. Kobzova J, Vignerova J, Blaha P, Krejcovsky L, Riedlova J. The 6th nationwide anthropological survey of children and adolescents in the Czech Republic in 2001. *Cent Eur J Public Health*. 2014;12(3):126-130.
10. Roberts C, Freeman J, Samdal O, Schnohr C, de Looze M, Gabhainn S, et al. The Health Behavior in School-aged Children (HBSC) study: Methodological developments and current tensions. *Int J Public Health*. 2009;54:S140-S150.
11. The HEALTHY Study Group. A school-based intervention for diabetes risk reduction. *N Engl J Med*. 2010.
12. Foster GD, Sherman S, Borradaile KE, Grundy KM, Vander Veur S, Nachmani J, et al. A policy-based school intervention to prevent overweight and obesity. *Pediatrics*. 2008;121:e794-e802.
13. Savva S, Tornaritis M, Savva m, Kourides Y, Panagi A, Silikiotou N, et al. Waist circumference and waist-to-height ratio are better predictors of cardiovascular disease risk factors in children than body mass index. *Int J Obes Relat Metab Disord*. 2000;24(11):1453-1458.
14. Moreno L. Trends in body mass index and overweight prevalence among children and adolescents in the region of Aragón (Spain) from 1985 to 1995. *Int J Obes*. 2000;24(7):925-931.

15. Statistics Canada. Microdata User Guide, National Longitudinal Survey of Children and Youth: Cycle 8 September 2008 to July 2009 2009 [Oct 20, 2014]. Available from: [http://www23.statcan.gc.ca/imdb-bmdi/document/4450\\_D4\\_T9\\_V8-eng.pdf](http://www23.statcan.gc.ca/imdb-bmdi/document/4450_D4_T9_V8-eng.pdf).
16. Ali A, Becker E, Chaundhury M, Fuller E, Harris J, Heeks F, et al. Health Survey for England 2006: Methodology and documentation: The Information Centre; 2006 [cited 3 Oct 20, 2014]. Available from: <http://www.hscic.gov.uk/pubs/hse06cvdandriskfactors>
17. Field AE, Austin S, Taylor CB, Malspeis S, Rosner B, Rockett H, et al. Relation between dieting and weight change among preadolescents and adolescents. *Pediatrics*. 2003;112(4):900-906.
18. Berlan E, Corliss H, Field AE, Goodman E, Byrn Austin S. Sexual orientation and bullying among adolescents in the Growing Up Today Study. *J Adolesc Health*. 2010;46(4):366-371.
19. Dennison B, Edmunds L, Stratton H, Pruzek M. Rapid infant weight gain predicts childhood obesity. *Obesity*. 2006;14(3):491-499.
20. Blumberg S, Foster E, Frasier A, Satorius J, Skalland B, Nysse-Carris K, et al. Design and operation of the National Survey of Children's Health, 2007. *Vital and Health Statistics*. 2012;1(55).
21. Youth Risk Behavior Surveillance System. 2013 YRBS Data User's Guide: Center's for Disease Control; 2013 [February 13, 2014]. Available from: [ftp://ftp.cdc.gov/pub/data/yrbs/2011/YRBS\\_2011\\_National\\_User\\_Guide.pdf](ftp://ftp.cdc.gov/pub/data/yrbs/2011/YRBS_2011_National_User_Guide.pdf).
22. US Bureau of Labor Statistics. National longitudinal of youth children and young adults: Data documentation codebook [Oct 14, 2014]. Available from: <https://www.nlsinfo.org/content/cohorts/nlsy79-children/get-data>.
23. National Health and Nutrition Examination Survey. 2001-2002 Data documentation, codebook, and frequencies: Body measurements 2004 [February 13, 2014]. Available from: [http://www.cdc.gov/nchs/nhanes/nhanes2001-2002/BMX\\_B.htm](http://www.cdc.gov/nchs/nhanes/nhanes2001-2002/BMX_B.htm).
24. Bogen D, Hanusa B, Whitaker R. The effect of breast-feeding with and without formula use on the risk of obesity at 4 years of age. *Obes Res*. 2004;12(9):1527-1535.
25. Gleason P, Dodd A. School breakfast program but not school lunch program participation is associated with lower body mass index. *J Am Diet Assoc*. 2009;109(2):S118-S128.
26. Lobstein T, James W, Cole TJ. Increasing levels of excess weight among children in England. *Int J Obes*. 2003;27:1136-1138.
27. Oza-Frank R, Hade EM, Conrey EJ. Inter-rater reliability of Ohio school-based overweight and obesity surveillance data. *Journal of the Academy of Nutrition and Dietetics*. 2012;112(9):1410-1414.
28. Sturm R, Datar A. Body mass index in elementary school children, metropolitan area food prices and food outlet density. *Public Health*. 2005;119:1059-1068.
29. Lawman HG, Mallya GVV, S, McCoy T, Colby L, Sanders T, Wylie-Rosett J, et al. Trends in relative weight over one year in low-income urban youth. *Obesity*. 2015; 23(2): 436-442.
30. Kim J, Must A, Fitzmaurice G, Gillman MW, Chomitz V, Kramer E, et al. Incidence and remission rates of overweight among children aged 5 to 13 years in a district-wide school surveillance system. *Am J Public Health*. 2005;95(9):1588-1594.
31. Lo JC, Maring B, Chandra M, Daniels SR, Sinaiko A, Daley MF, et al. Prevalence of obesity and extreme obesity in children aged 3–5 years. *Pediatric Obesity*. 2013;ePub ahead of print.

32. Smith N, Coleman KJ, Lawrence JM, Quinn V, Getahun D, Reynolds K, et al. Body weight and height data in electronic medical records of children. *Int J Pediatr Obes.* 2010;5:237-242.
33. Nader PR, O'Brien M, Houts R, Bradley R, Belsky J, Crosnoe R, et al. Identifying risk for obesity in early childhood. *Pediatrics.* 2006;118(3):e594-e601.
34. Weedn A, Ang SC, Zeman CL, Darden PM. Obesity prevalence in low-income preschool children in Oklahoma. *Clin Pediatr (Phila).* 2012;51(10):917-922.
35. National Center for Chronic Disease Prevention and Health Promotion. Pediatric and Pregnancy Nutrition Surveillance System: Summary and data quality sections 2009 [Oct 14, 14]. Available from: [http://www.cdc.gov/pednss/how\\_to/review\\_data\\_quality/periodic\\_data\\_quality\\_report/data\\_quality.htm](http://www.cdc.gov/pednss/how_to/review_data_quality/periodic_data_quality_report/data_quality.htm)
36. Gundersen C, Lohman BJ, Eisenmann JC, Garasky S, Stewart SD. Child-specific food insecurity and overweight are not associated in a sample of 10- to 15- year-old low-income youth. *J Nutr.* 2008;131(2):371-378.
37. Sekhobo J, Edmunds L, Reynolds D, Dalenius K, Sharma A. Trends in prevalence of obesity and overweight among children enrolled in the New York state WIC program, 2002-2007. *Public Health Rep.* 2010;125(2):218-224.
38. Novotny R, Oshiro C, Wilkens L. Prevalence of childhood obesity among young multiethnic children from a health maintenance organization in Hawaii. *Childhood Obesity.* 2013;9(1):35-42.
39. Madsen K, Weedn A, Crawford P. Disparities in peaks, plateaus, and declines in prevalence of high BMI among adolescents. *Pediatrics.* 2010;126(3):434-442.
40. Conde W, Monteiro C. Body mass index cutoff points for evaluation of nutritional status in Brazilian children and adolescents. *J Pediatr (Rio J).* 2006;82(4):266-272.
41. Melnik T, Rhoades S, Wales K, Cowell C, Wolfe W. Overweight school children in New York City: prevalence estimates and characteristics. *Int J Obes Relat Metab Disord.* 1998;22(1):7-14.
42. World Health Organization. Physical status: The use and interpretation of anthropometry. WHO Technical Report Series. 1995;854:218.
43. Centers for Disease Control and Prevention. Cut-offs to define outliers in the 2000 CDC Growth Charts [October 1, 2013]. Available from: <http://www.cdc.gov/nccdphp/dnpa/growthcharts/resources/BIV-cutoffs.pdf>.
44. Mei Z, Scanlon K, Grummer-Strawn L, Freedman D, Yip R, Trowbridge F. Increasing prevalence of overweight among US low-income preschool children: The Centers for Disease Control and Prevention Pediatric Nutrition Surveillance, 1983 to 1995 *Pediatrics.* 1998;101(1):e12.
45. Pan L, Blanck HM, Sherry B, Dalenius K, Grummer-Strawn LM. Trends in the prevalence of extreme obesity among US preschool-ages children living in low-income families, 1998-2010. *JAMA.* 2012;308(24):2563-2565.
46. Berger M, Konty K, Day S, Silver LD, Nonas C, Kerker BD, et al. Obesity in K-8 students-- New York City, 2006-07 to 2010-11 school years. *Morbidity and Mortality Weekly Report.* 2011;60(49):1673-1678.
47. Ratcliff MB, Jenkins TM, Reiter-Purtill J, Noll J, Zeller MH. Risk-taking behaviors of adolescents with extreme obesity: Normative or not? *Pediatrics.* 2011;127:827-834.

48. Kim J, Must A, Fitzmaurice GM, Gillman MW, Chomitz V, Kramer E, et al. Relationship of Physical Fitness to Prevalence and Incidence of Overweight among Schoolchildren. *Obes Res.* 2005;13(7):1246-1254.
49. Koebnick C, Smith N, Coleman KJ, Getahun D, Reynolds K, Quinn B, et al. Prevalence of extreme obesity in a multiethnic cohort of children and adolescents. *J Pediatr.* 2010;157:26-31.
